# Supplementary material for: Correlation of magnetic resonance (EPR, ssNMR) parameters and crystal-microstrain in marbles as a tool to probe their provenance
Source: Royal Society of Chemistry journal article supplement (doi:10.1039/d3cp02974c), 2023-01-01
Supplement: d3cp02974c1.pdf [file d3cp02974c1.pdf]

## Supporting Information

# Correlation of Magnetic Resonance (EPR, ssNMR) Parameters and Crystal-Microstrain in Marbles as a Tool to Probe their Provenance

Loukas Belles<sup>1</sup>, Christos Dimitriou<sup>1</sup>, Constantinos Moularas<sup>1</sup>, Maria Solakidou<sup>1</sup>, Marinos Theorodakopoulos<sup>2</sup>, Maria Louloudi<sup>2</sup> and Yiannis Deligiannakis<sup>1\*</sup>

<sup>1</sup>Laboratory of Physical Chemistry of Materials & Environment, Department of Physics, University of Ioannina, 45110, Ioannina, Greece

<sup>2</sup>Laboratory of Biomimetic Catalysis & Hybrid Materials, Department of Chemistry, University of Ioannina, 45110 Ioannina, Greece

\*Corresponding Author: [ideligia@uoi.gr](mailto:ideligia@uoi.gr)

### Contents

|                                                                                                                                                      |     |
|------------------------------------------------------------------------------------------------------------------------------------------------------|-----|
| <b>Supplementary Figures</b> .....                                                                                                                   | S2  |
| Supplementary Figure 1 .....                                                                                                                         | S2  |
| Supplementary Figure 2 .....                                                                                                                         | S3  |
| Supplementary Figure 3 .....                                                                                                                         | S5  |
| Supplementary Figure 4 .....                                                                                                                         | S8  |
| Supplementary Figure 5 .....                                                                                                                         | S9  |
| Supplementary Figure 6 .....                                                                                                                         | S10 |
| Supplementary Figure 7 .....                                                                                                                         | S10 |
| Supplementary Figure 8 .....                                                                                                                         | S11 |
| <b>Supplementary Tables</b> .....                                                                                                                    | S11 |
| <b>Table S1:</b> Microstrain $\epsilon_0$ values for the calcined Greek marbles (#2, #4, #5, #6) obtained from TOPAS analysis for the XRD data ..... | S11 |
| <b>Table S2:</b> Spin Hamiltonian parameters for the calcined Greek marbles (#2, #4, #5, #6). .....                                                  | S12 |

## Supplementary Figures

### Supplementary Figure 1

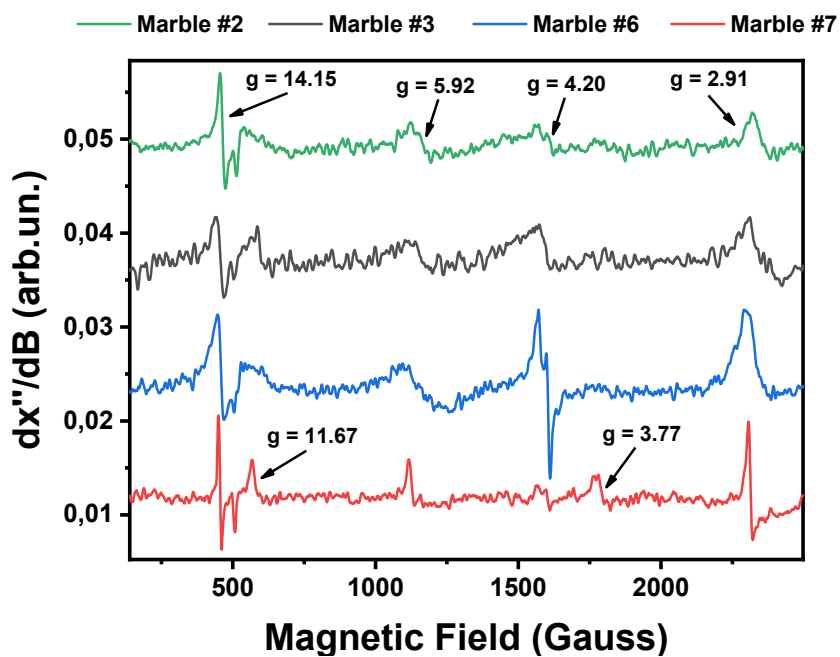

**Figure S1:** EPR spectra of  $\text{Fe}^{3+}$  ions ( $S = 5/2$ ) in Greek marbles #2, #3, #6 and #7. g-values for the  $\text{Fe}^{3+}$  species are indexed.

Supplementary Figure 2

High Temperature EPR spectra 300 K up to 700 K.

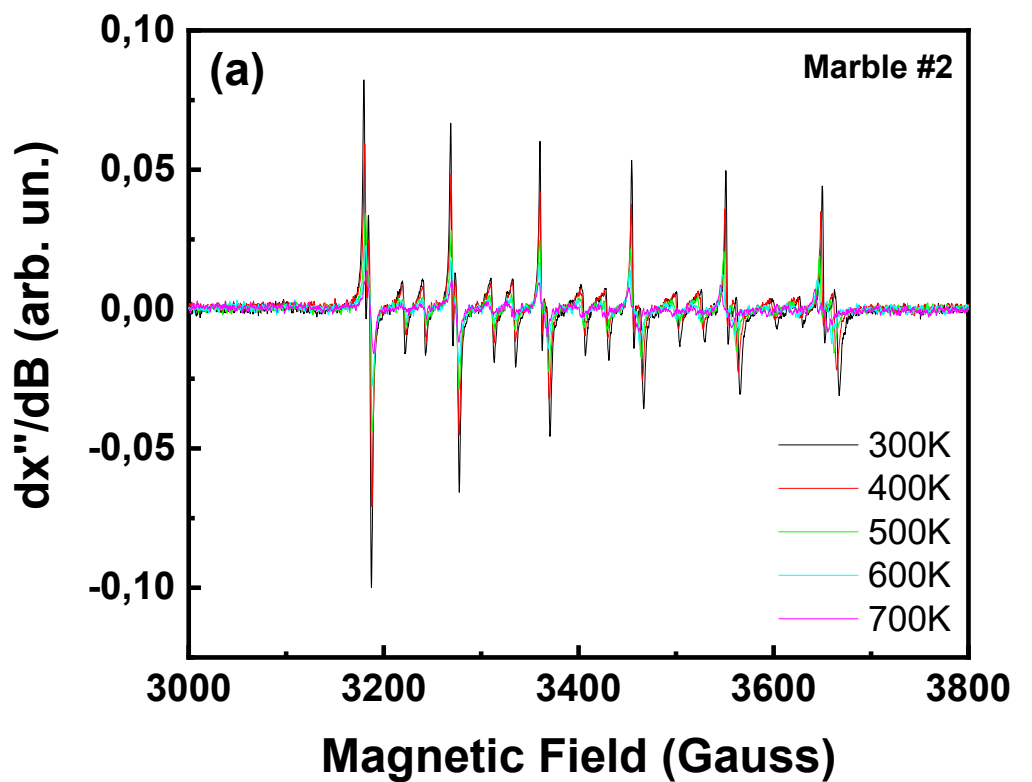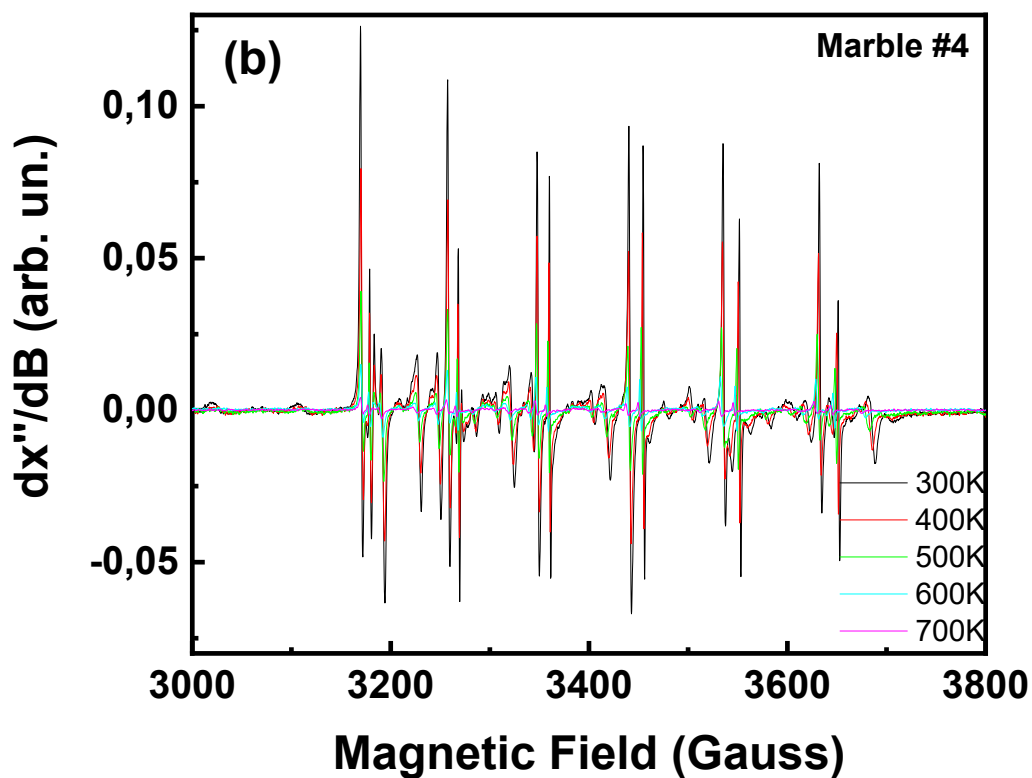

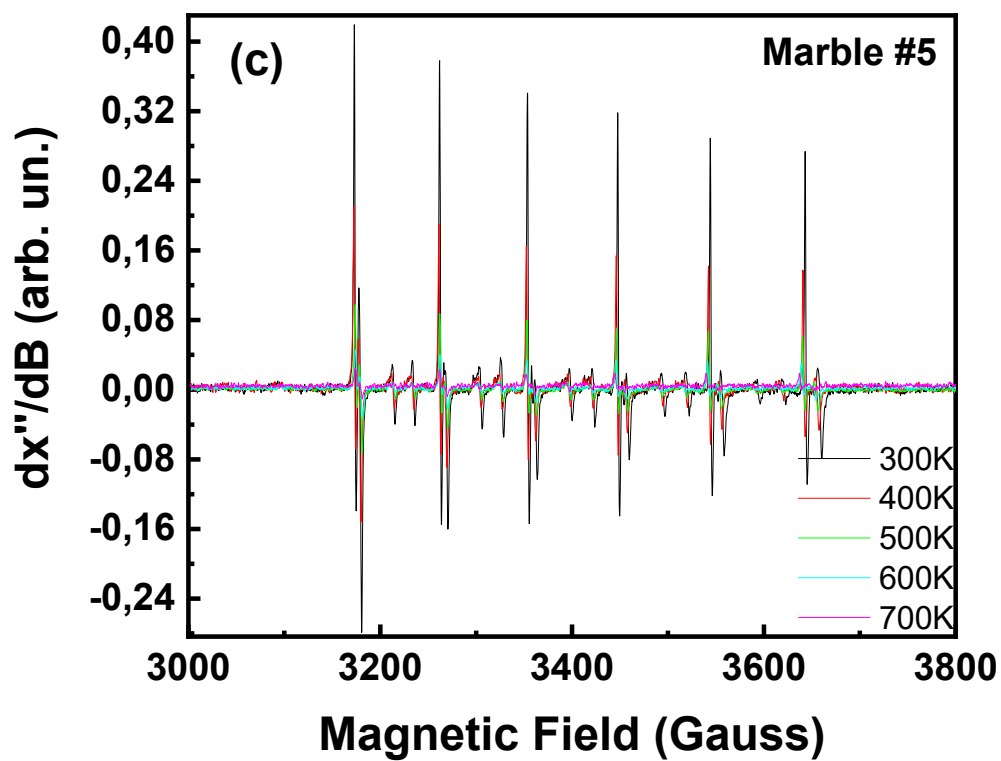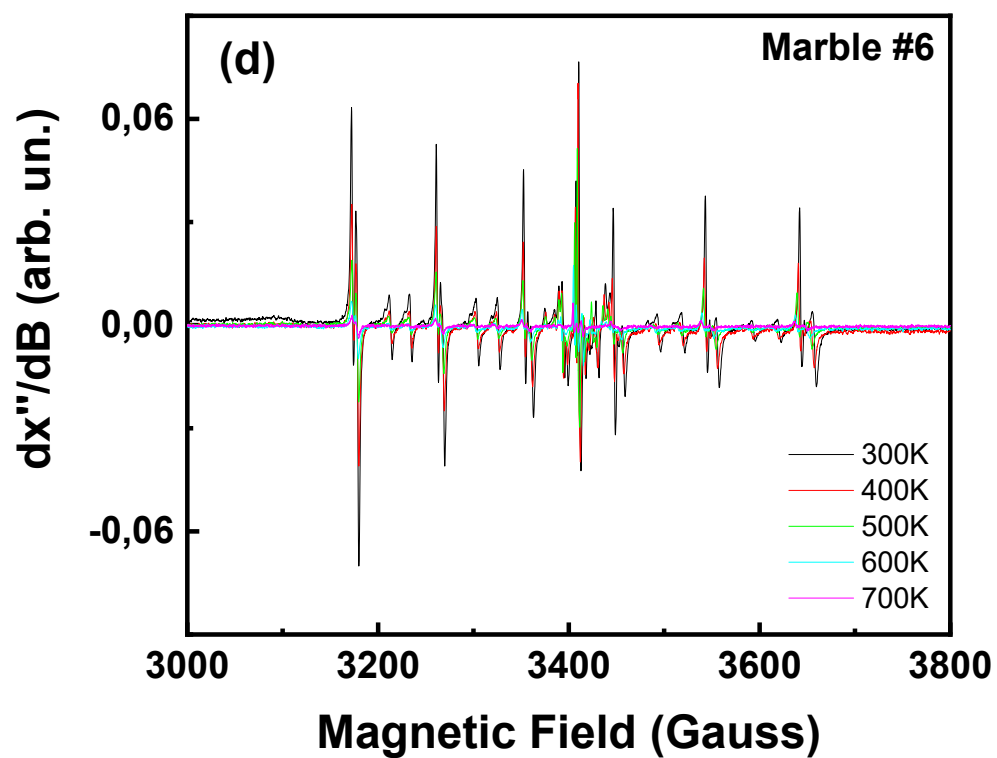

**Figure S2:** High Temperature EPR spectra for selected Greek Marbles according to their phase composition. (a) Marble #2-Ioannina, (b) Marble #4-Thassos, (c) Marble #5-Kavala and (d) Marble #6-Chios.

### Supplementary Figure 3

In Figure S.3 a-d we present the EPR spectra of each selected marble at 300K before calcination (black line) and at 300K after calcined up to 700K ( 4 hours rest at 700K).

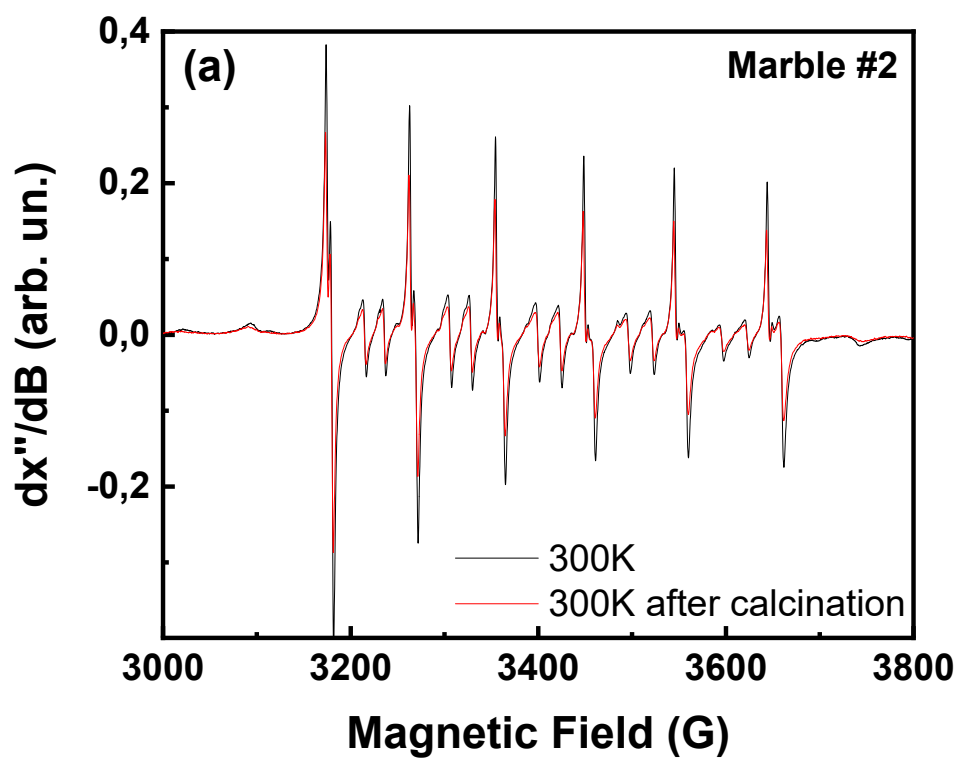

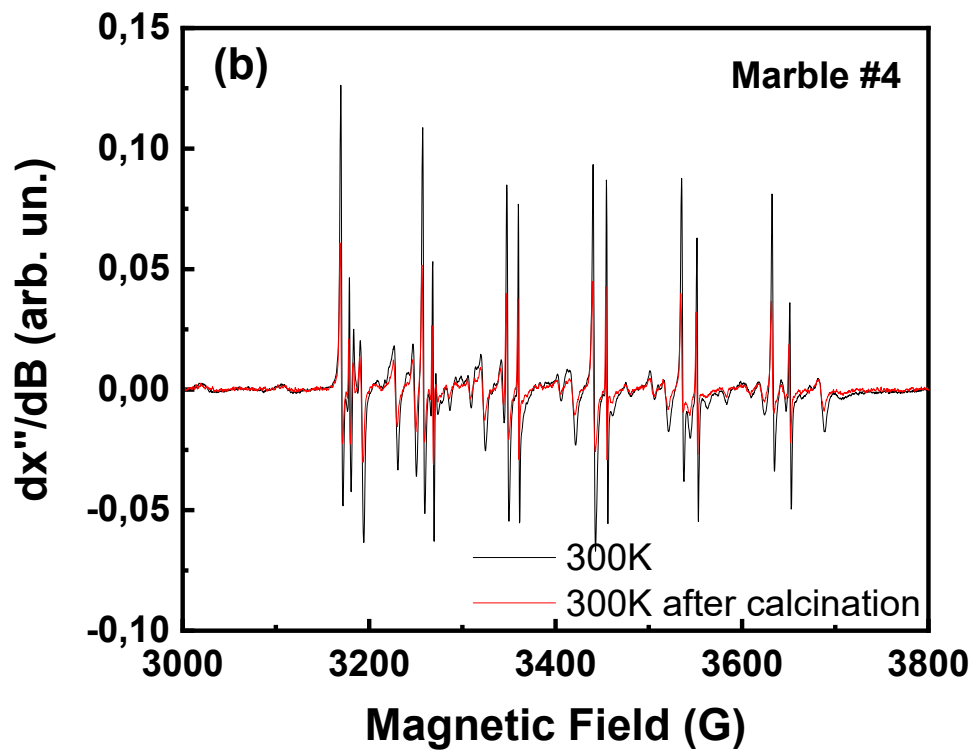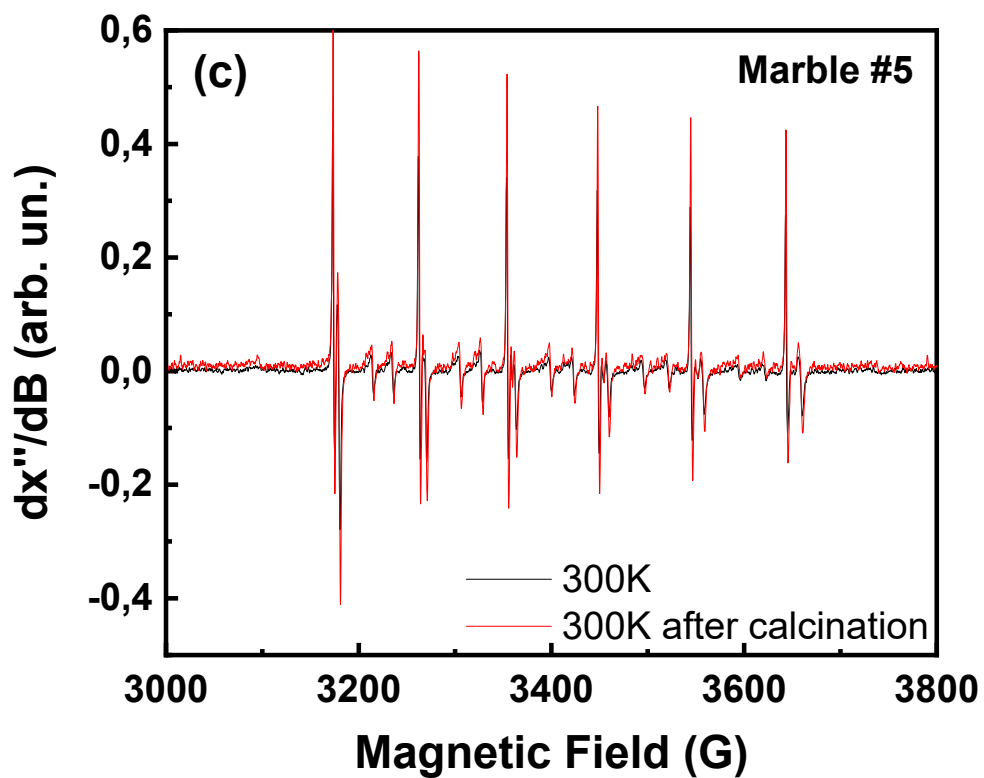

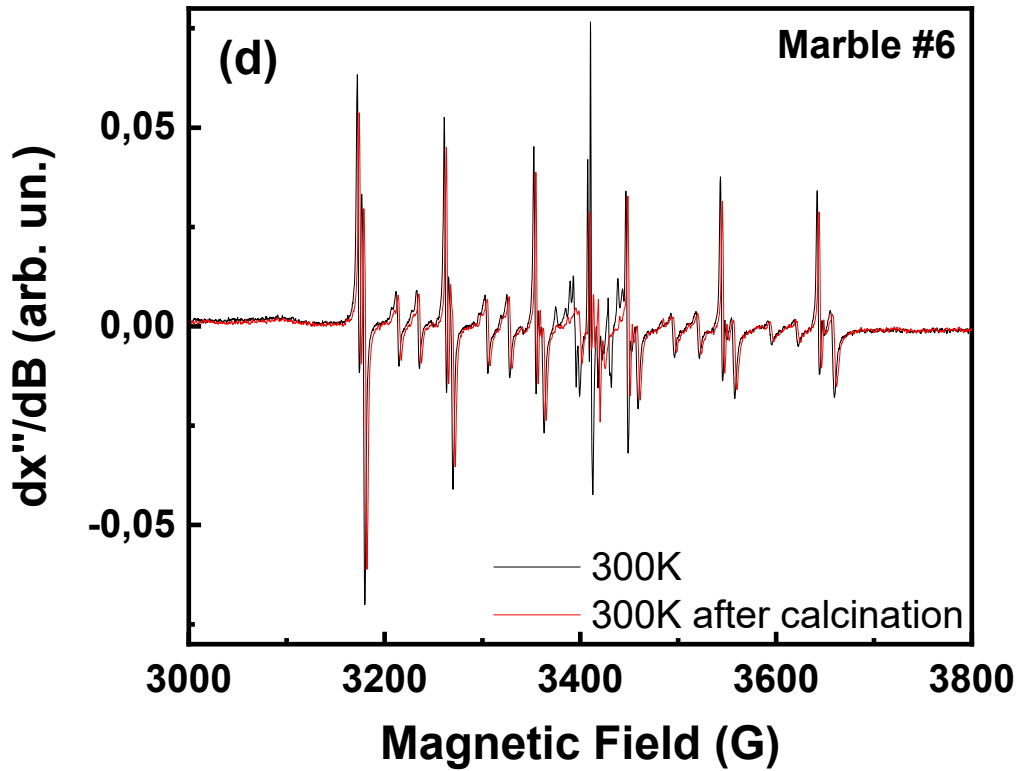

Figure S3: High Temperature EPR spectra from selected Greek Marbles before and after calcination. (a) Marble #2, (b) Marble #4, (c) Marble #5 and (d) Marble #6.

Supplementary Figure 4

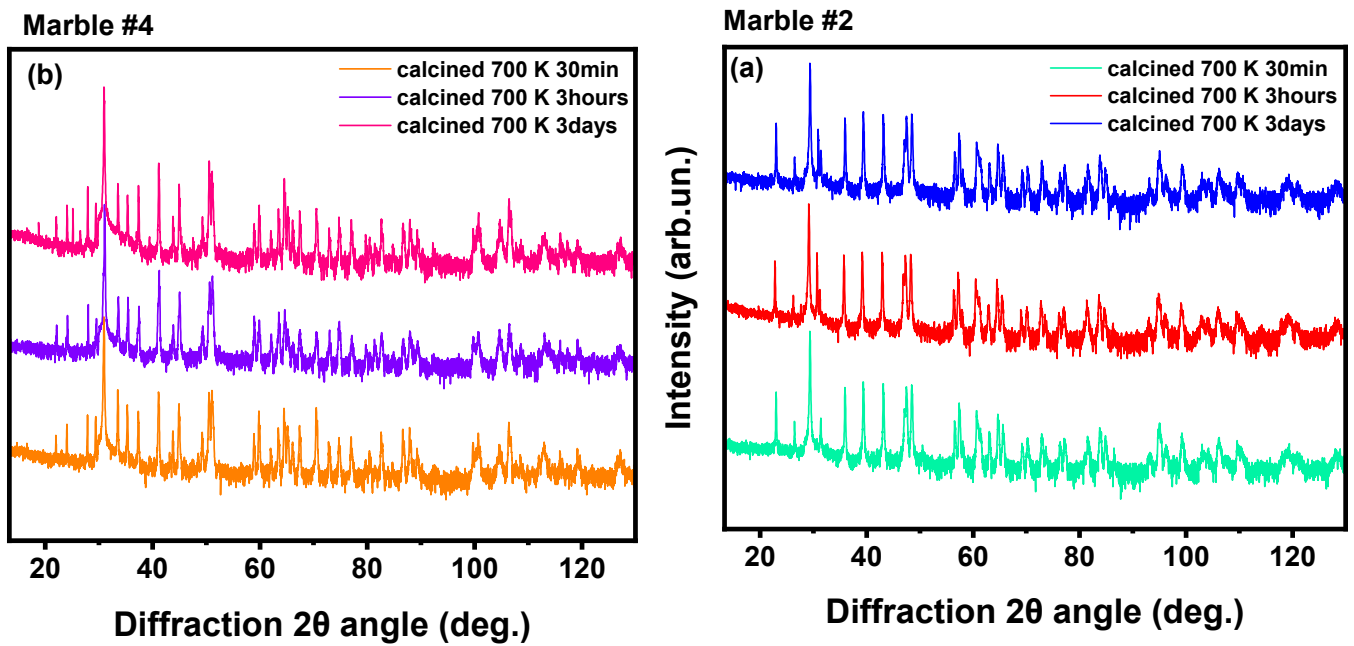

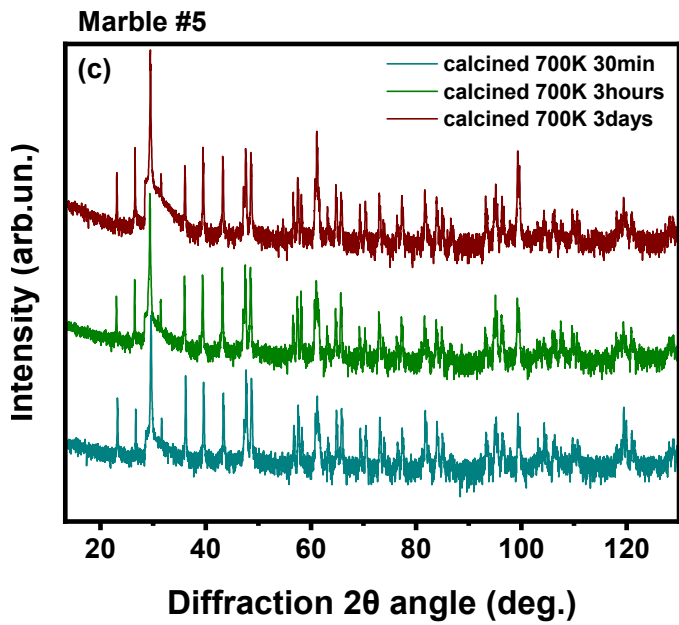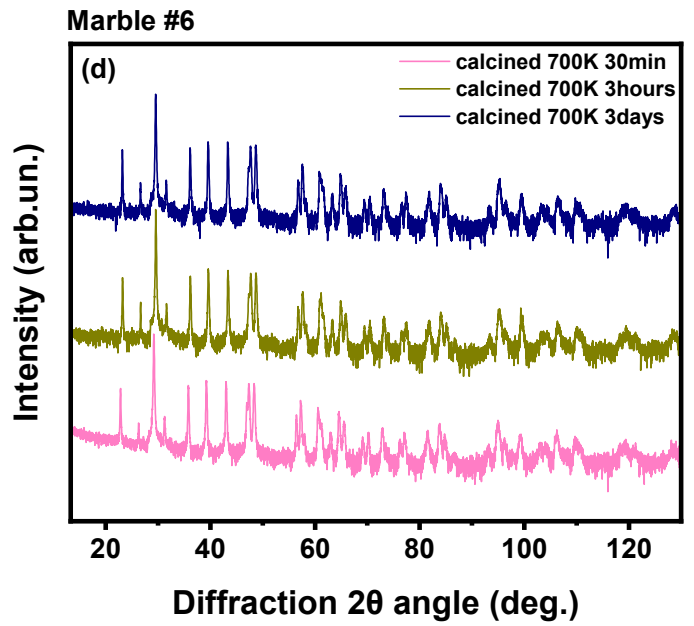

Figure S4: XRD patterns of the selected Greek marbles (a) #2, (b) #4, (c) #5, (d) #6 with a calcination treatment of 700 K for 30 min, 3 hours and 3 days.

### Supplementary Figure 5

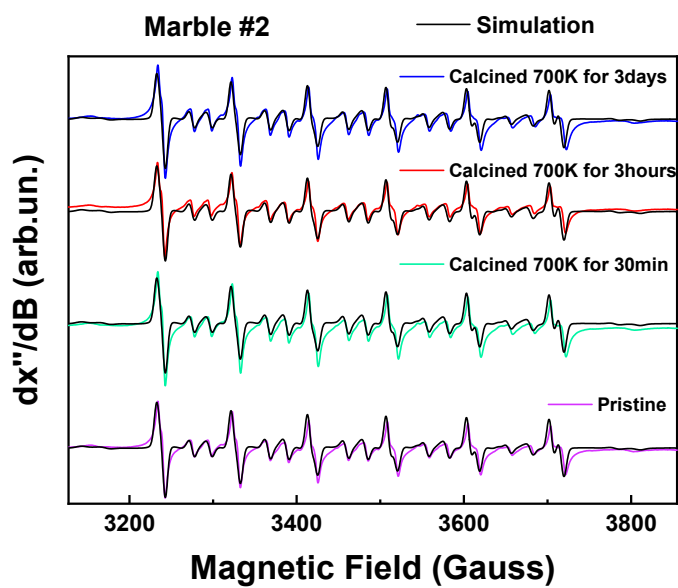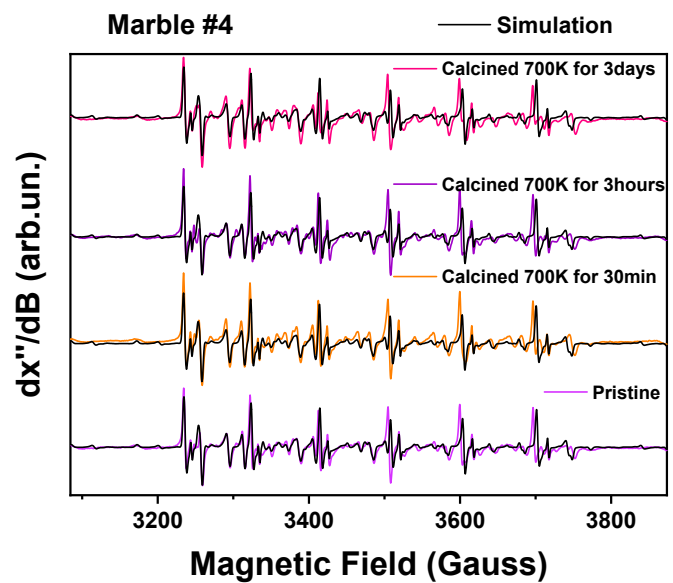



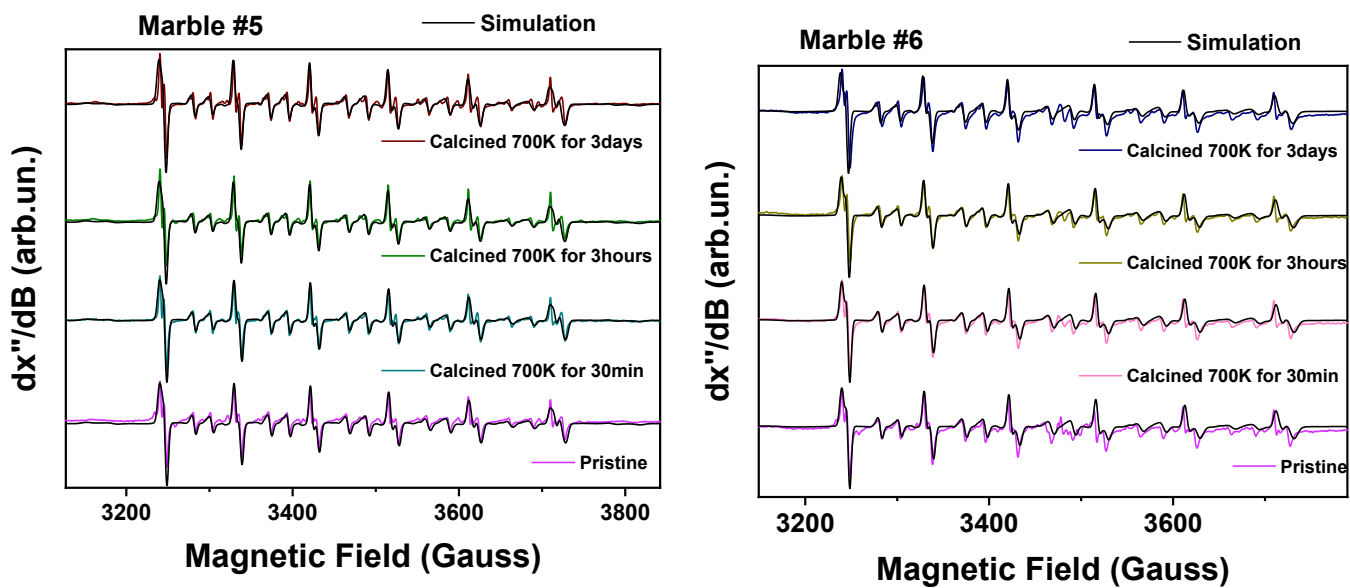

**Figure S5:** EPR spectra of selected Greek marbles (#2, #4, #5, #6) calcined at 700 K for different time periods.

### Supplementary Figure 6

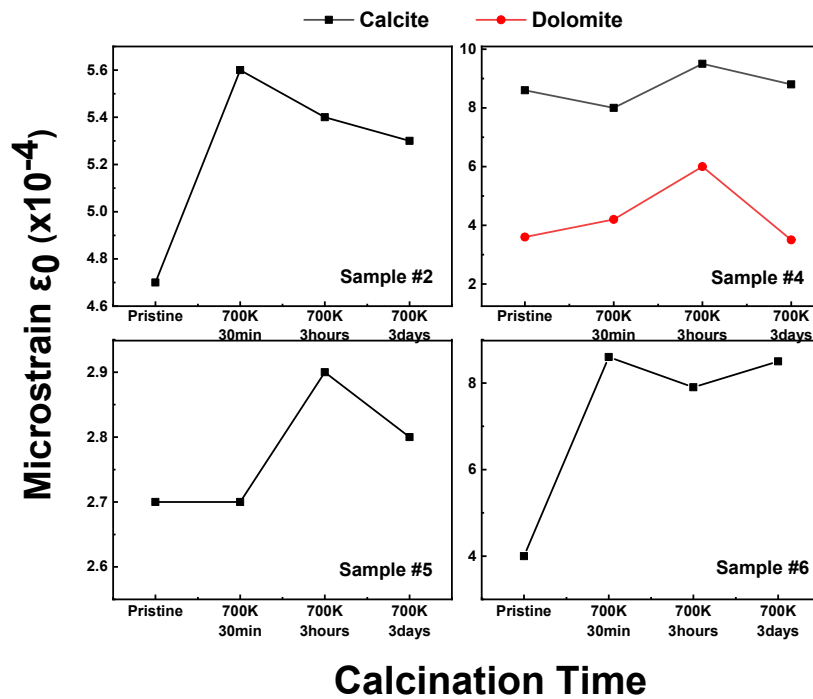

Figure S6: Microstrain vs calcination time for the temperature of 700 K.

### Supplementary Figure 7

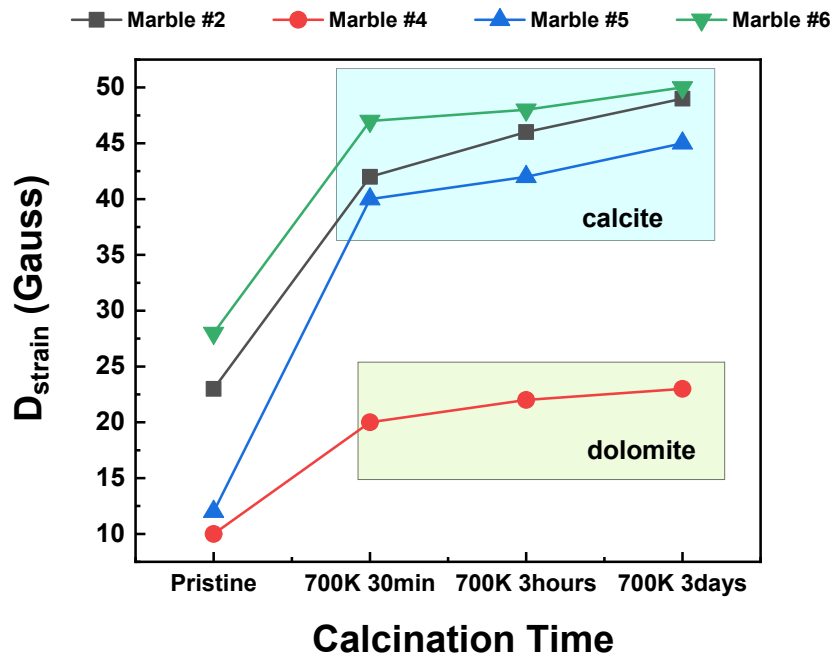

Figure S7:  $D_{\text{strain}}$  versus calcination time of the selected Greek marbles (#2, #4, #5, #6). We acknowledge that calcitic marbles have large  $D_{\text{strain}} = 35\text{-}50$  G over time, whilst dolomitic have low  $D_{\text{strain}} = 15\text{-}20$  G.

## Supplementary Figure 8

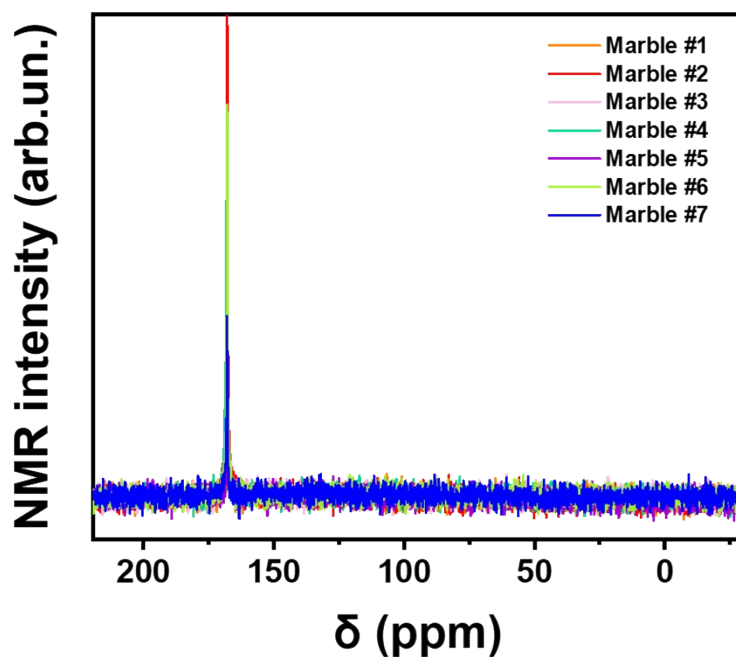

Figure S8:  $^{13}\text{C}$  NMR spectra of marbles.

## Supplementary Tables

Table S1: Microstrain  $\epsilon_0$  values for the calcined Greek marbles (#2, #4, #5, #6) obtained from TOPAS analysis for the XRD data.

| Calcination Time | Microstrain $\epsilon_0$ ( $\times 10^{-4}$ ) |                                          |
|------------------|-----------------------------------------------|------------------------------------------|
|                  | Calcite<br>$\text{CaCO}_3$                    | Dolomite<br>$\text{CaMg}(\text{CO}_3)_2$ |
| <b>Marble #2</b> |                                               |                                          |
| 700K for 30 min  | $5.6 \pm 0.2$                                 | –                                        |
| 700K for 3 hours | $5.4 \pm 0.1$                                 | –                                        |
| 700K for 3 days  | $5.3 \pm 0.1$                                 | –                                        |
| <b>Marble #4</b> |                                               |                                          |
| 700K for 30 min  | $8.0 \pm 0.7$                                 | $4.2 \pm 0.6$                            |
| 700K for 3 hours | $9.5 \pm 1.7$                                 | $6.0 \pm 0.6$                            |
| 700K for 3 days  | $8.8 \pm 1.3$                                 | $3.5 \pm 0.7$                            |
| <b>Marble #5</b> |                                               |                                          |
| 700K for 30 min  | $2.7 \pm 0.2$                                 | –                                        |
| 700K for 3 hours | $2.9 \pm 0.4$                                 | –                                        |
| 700K for 3 days  | $2.8 \pm 0.4$                                 | –                                        |
| <b>Marble #6</b> |                                               |                                          |
| 700K for 30 min  | $8.6 \pm 0.2$                                 | –                                        |
| 700K for 3 hours | $7.9 \pm 0.4$                                 | –                                        |
| 700K for 3 days  | $8.5 \pm 0.4$                                 | –                                        |

**Table S2:** Spin Hamiltonian parameters for the calcined Greek marbles (#2, #4, #5, #6).

| Calcination Time | A [ $A_x, A_y, A_z$ ] (Gauss) ( $\pm 1$ ) | [D, E] (Gauss) ( $\pm 0.5$ ) | $D_{\text{strain}}$ (Gauss) ( $\pm 1$ ) | g ( $\pm 0.0001$ ) |
|------------------|-------------------------------------------|------------------------------|-----------------------------------------|--------------------|
| <b>Marble #2</b> |                                           |                              |                                         |                    |
| 700K for 30 min  | [95, 94, 93]                              | [86.0, 4.3]                  | 42                                      | 2.0005             |
| 700K for 3 hours | [95, 94, 93]                              | [86.4, 4.3]                  | 46                                      | 2.0005             |
| 700K for 3 days  | [95, 94, 93]                              | [85.2, 4.3]                  | 49                                      | 2.0005             |
| <b>Marble #4</b> |                                           |                              |                                         |                    |
| 700K for 30 min  | [94, 95, 95]                              | [14.0, 0.5]                  | 20                                      | 2.0005             |
| 700K for 3 hours | [95, 95, 95]                              | [14.5, 0.5]                  | 22                                      | 2.0005             |
| 700K for 3 days  | [95, 95, 95]                              | [14.9, 0.5]                  | 23                                      | 2.0005             |
| <b>Marble #5</b> |                                           |                              |                                         |                    |
| 700K for 30 min  | [93, 96, 93]                              | [82.0, 4.6]                  | 40                                      | 2.0005             |
| 700K for 3 hours | [93, 96, 93]                              | [90.3, 4.6]                  | 42                                      | 2.0005             |
| 700K for 3 days  | [93, 96, 93]                              | [83.3, 4.6]                  | 45                                      | 2.0005             |
| <b>Marble #6</b> |                                           |                              |                                         |                    |
| 700K for 30 min  | [94, 96, 94]                              | [90.0, 3.6]                  | 47                                      | 2.0005             |
| 700K for 3 hours | [94, 94, 93]                              | [89.8, 3.6]                  | 48                                      | 2.0005             |
| 700K for 3 days  | [94, 94, 93]                              | [85.3, 3.6]                  | 50                                      | 2.0005             |

**Table S3:** Integrated areas of the  $^{13}\text{C}$  solid state NMR spectra of Greek marbles.

| Marble | Integrated area |
|--------|-----------------|
| #1     | 101613          |
| #2     | 450926          |
| #3     | 256272          |
| #4     | 349316          |
| #5     | 95384           |
| #6     | 301752          |
| #7     | 122979          |
